# Supplementary material
Source: MDPI journal article supplement (https://www.mdpi.com/2073-4441/14/17/2674)
Supplement: s1 [file s1]

**Supplementary data**

**Nutrient thresholds required to control eutrophication: Does it  
work for natural alkaline lakes?**

Jing Qi<sup>a</sup>, Le Deng<sup>a</sup>, Yongjun Song<sup>a</sup>, Weixiao Qi<sup>b,\*</sup>, Chengzhi Hu<sup>a,c</sup>

<sup>a</sup> Key Laboratory of Drinking Water Science and Technology, Research Center for Eco-Environmental Sciences, Chinese Academy of Sciences, Beijing 100085, China

<sup>b</sup> State Key Joint Laboratory of Environmental Simulation and Pollution Control, School of Environment, Tsinghua University, Beijing 100084, China

<sup>c</sup> University of Chinese Academy of Sciences, Beijing 100049, China

**\* Corresponding author.**

E-mail address: wxqi@mail.tsinghua.edu.cn (W. Qi)

**Table S1 Physical and chemical indexes of water samples collected at site H.**

| Water quality index       | Nutrient threshold bioassay | Nutrient addition bioassay |
|---------------------------|-----------------------------|----------------------------|
|                           | experiments                 | experiments                |
| WT(°C)                    | 15.20                       | 24.10                      |
| EC (ms/cm)                | 1296                        | 1310                       |
| TOC (mg/L)                | 78.20                       | 75.69                      |
| pH                        | 9.65                        | 9.10                       |
| COD <sub>Mn</sub> (mg/L)  | 6.70                        | 6.70                       |
| SRP (mg/L)                | 0.059                       | 0.060                      |
| NH <sub>4</sub> -N (mg/L) | 0.15                        | 0.32                       |
| NO <sub>3</sub> -N (mg/L) | 0.40                        | 0.39                       |
